# Supplementary material for: Prevention of 7-Ketocholesterol-Induced Overproduction of Reactive Oxygen Species, Mitochondrial Dysfunction and Cell Death with Major Nutrients (Polyphenols, ω3 and ω9 Unsaturated Fatty Acids) of the Mediterranean Diet on N2a Neuronal Cells
Source: MDPI journal article supplement (doi:10.3390/molecules25102296), 2020-05-13
Supplement: s1 [file s1]

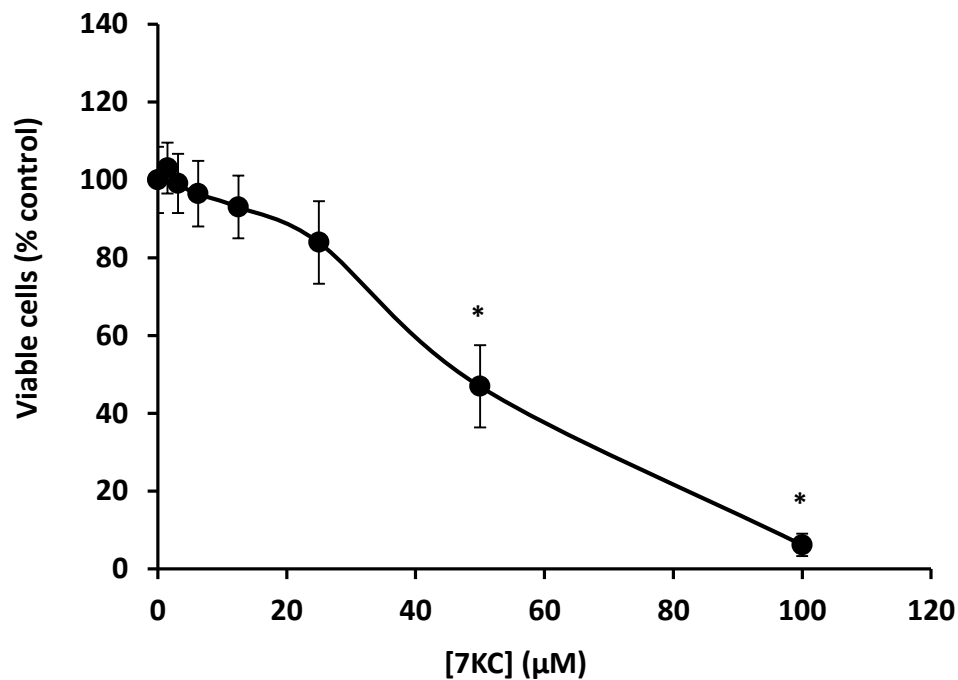

**Figure S1.** Evaluation with the fluorescein diacetate (FDA) assay of the effects of 7-ketocholesterol on the cell viability of N2a cells. Murine neuroblastoma N2a cells, previously cultured for 24 h, were further cultured for 48 h with or without 7-ketocholesterol (7KC) at concentrations ranging from 1.5 to 100  $\mu$ M. The results are in percentages relatively to the control (untreated cells). Data obtained with the FDA are shown. Data shown are expressed as mean  $\pm$  standard deviation (SD) of four independent experiments performed in triplicate. Significance of the differences between control (untreated cells) and 7KC-treated cells; Mann Whitney test: \*  $P < 0.05$  or less.
